# Supplementary material for: Deciphering HLA-I motifs across HLA peptidomes improves neo-antigen predictions and identifies allostery regulating HLA specificity
Source: PubMed Central journal article supplement (PMC5584980; doi:10.1371/journal.pcbi.1005725), 2017-08-23
Supplement: pcbi.1005725.s001.pdf [file pcbi.1005725.s001.pdf]

# Supplementary Information

## **Deciphering HLA-I motifs across HLA peptidomes improves neo-antigen predictions and identifies allostery regulating HLA specificity**

Michal Bassani-Sternberg<sup>1,2,\*</sup>, Chloé Chong<sup>1,2</sup>, Philippe Guillaume<sup>1,2</sup>, Marthe Solleder<sup>1,3</sup>, HuiSong Pak<sup>1,2</sup>, Philippe O Gannon<sup>2</sup>, Lana E Kandalaf<sup>1,2</sup>, George Coukos<sup>1,2</sup>, David Gfeller<sup>1,2,3,\*</sup>

<sup>1</sup>Ludwig Centre for Cancer Research, University of Lausanne, 1066 Epalinges, Switzerland.

<sup>2</sup>Department of Fundamental Oncology, University Hospital of Lausanne, Lausanne, Switzerland.

<sup>3</sup>Swiss Institute of Bioinformatics (SIB), 1015 Lausanne, Switzerland.

\*To whom correspondence should be sent: [David.Gfeller@unil.ch](mailto:David.Gfeller@unil.ch) and [Michal.Bassani@chuv.ch](mailto:Michal.Bassani@chuv.ch).

# Supplementary Figures

## Mel\_15

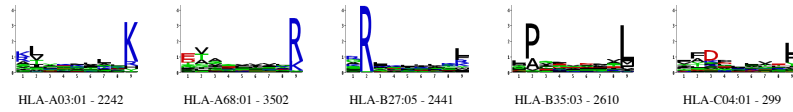

## Mel\_16

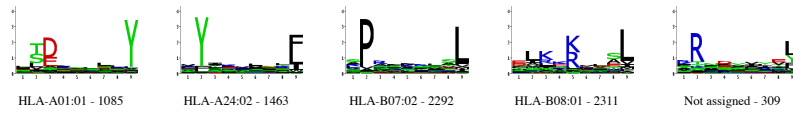

## Mel\_12

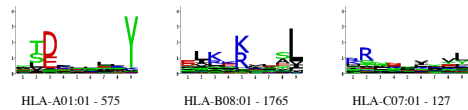

## Mel\_8

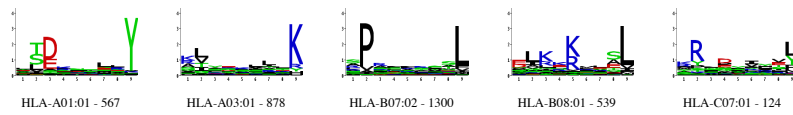

## Mel\_5

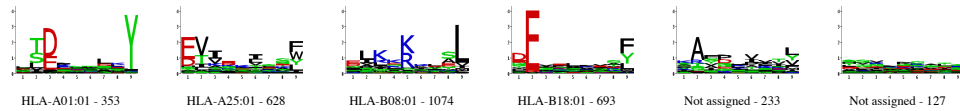

## Fibroblast

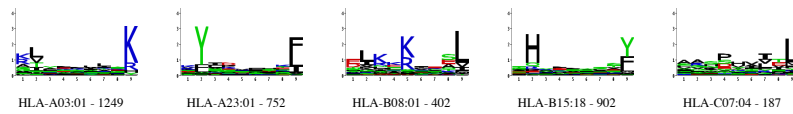

## HCC1143

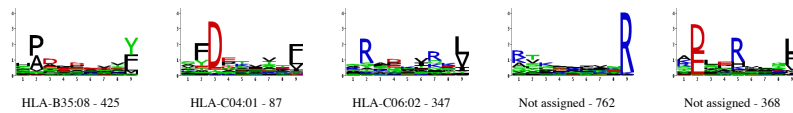

## HCC1937

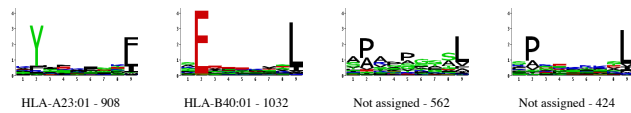

## HCT116

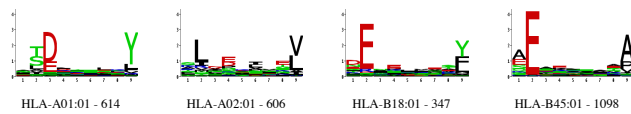

## JY

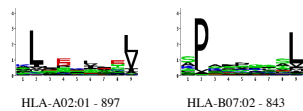

## Bcell

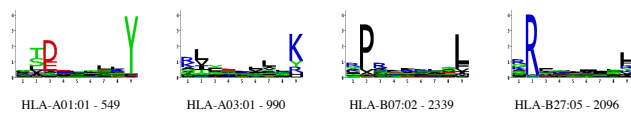

**MAVER\_1**

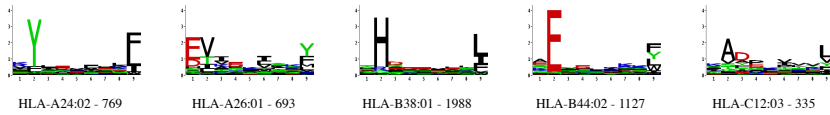

**HEK293**

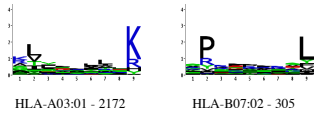

**HL\_60**

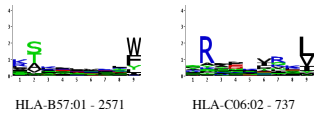

**RPMI8226**

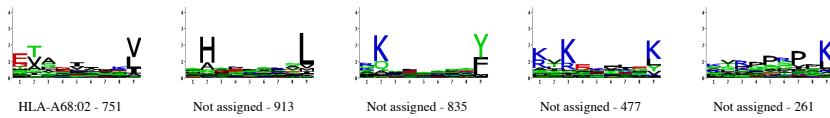

**THP\_1**

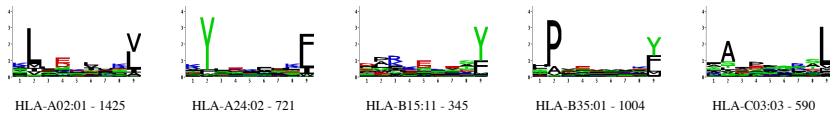

**CA46**

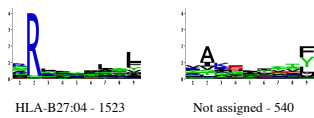

**CD165**

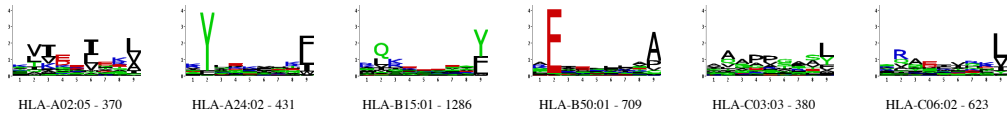

**CM467**

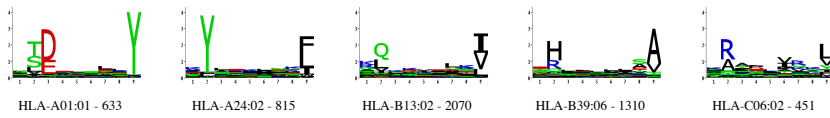

**GD149**

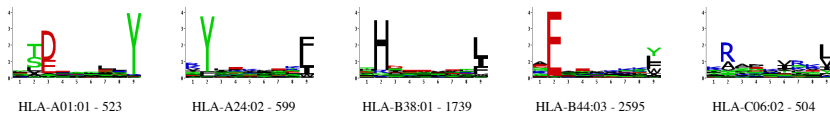

**MD155**

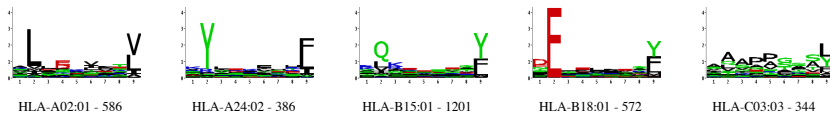

**PD42**

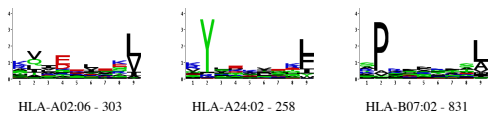

**RA957**

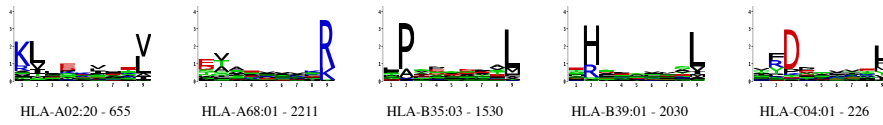

**TIL1**

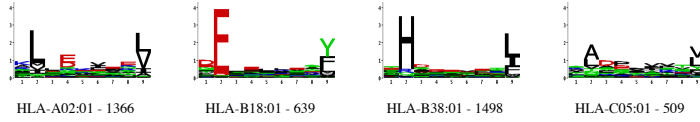

**TIL3**

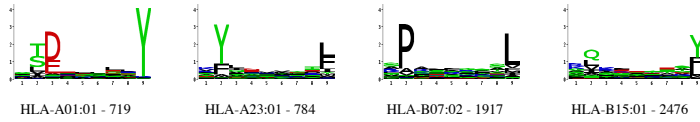

**Apher1**

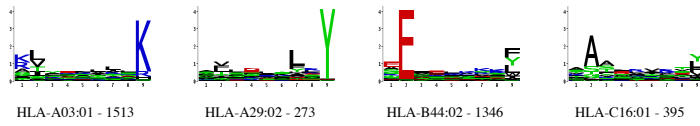

**Apher6**

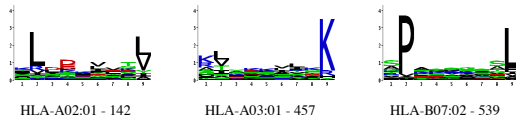

**LNT-229-all**

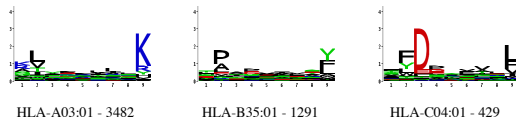

**T98G-all**

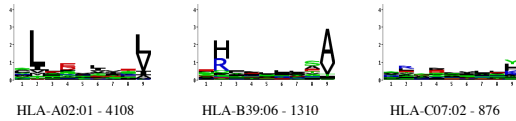

**U-87-all**

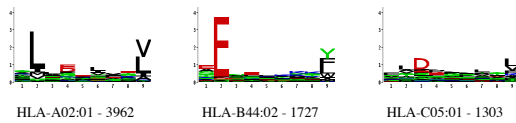

**Mel-624**

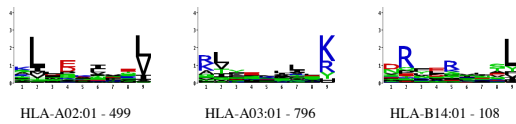

**SK-Mel-5**

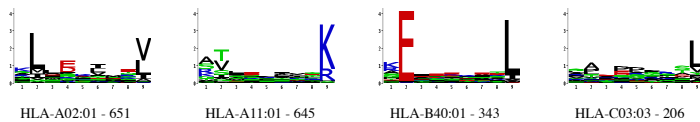

**pat\_AC2**

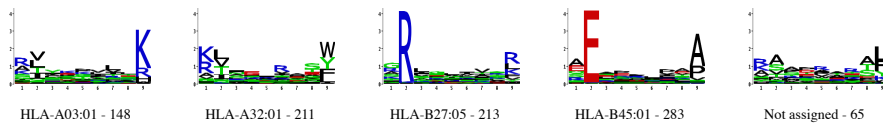

pat\_C

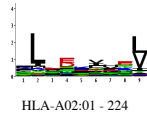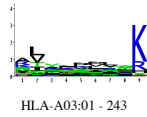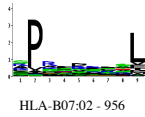

pat\_CELG

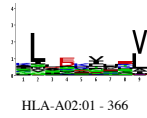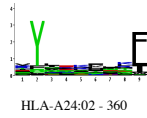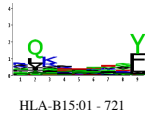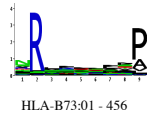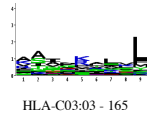

pat\_CP2

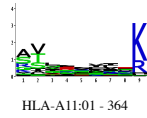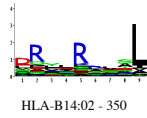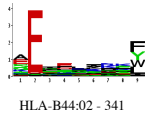

pat\_FL

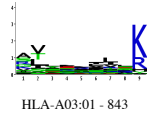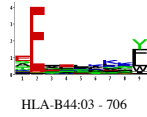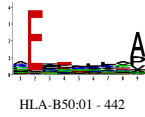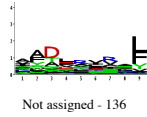

pat\_J

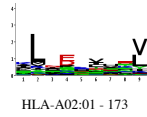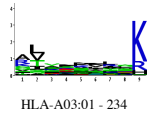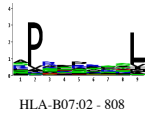

pat\_JPB3

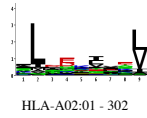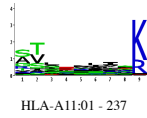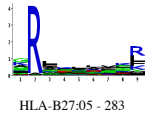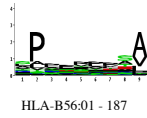

pat\_JT2

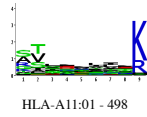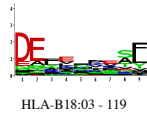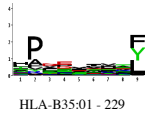

pat\_M

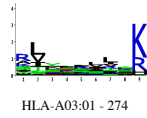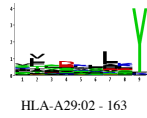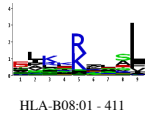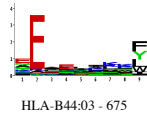

pat\_MA

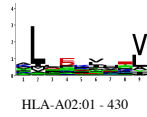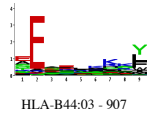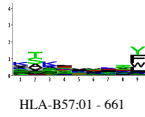

pat\_ML

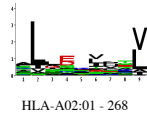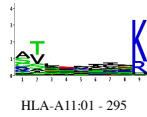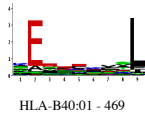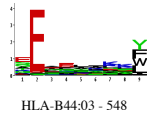

pat\_NS2

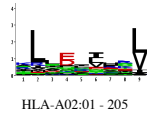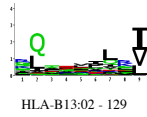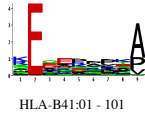

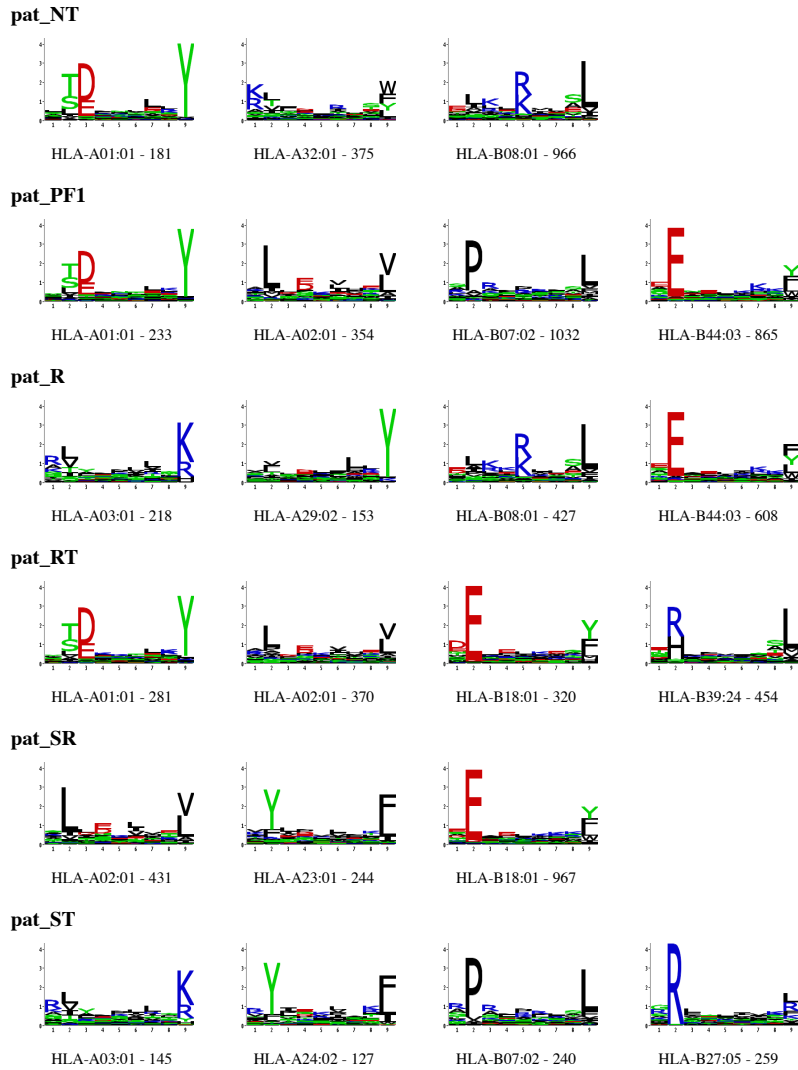

**Fig A:** Motifs identified across all HLA peptidomics datasets analyzed in this work. The allele to which the logos have been mapped by the approach presented in this work and the number of peptides assigned to this allele is indicated below each motif. The few motifs that could not be assigned to an allele are annotated as “Not assigned”.

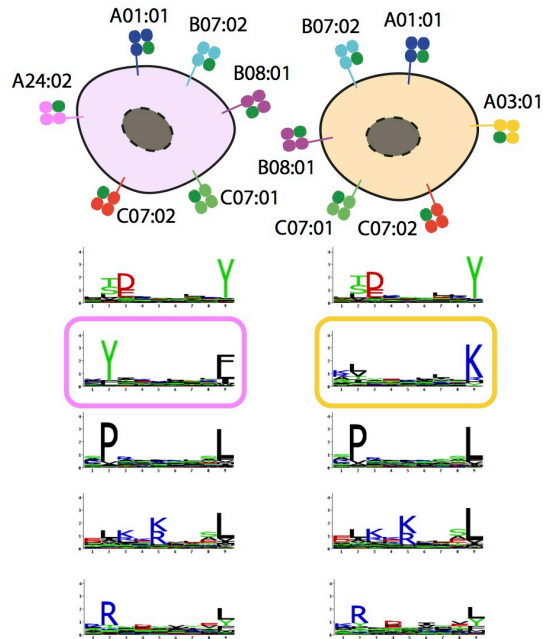

**Fig B:** Strategy to annotate motifs in cases where two samples share all but one motif. The left sample (Mel\_16) and the right sample (Mel\_8) come from two different melanoma patients from [1].

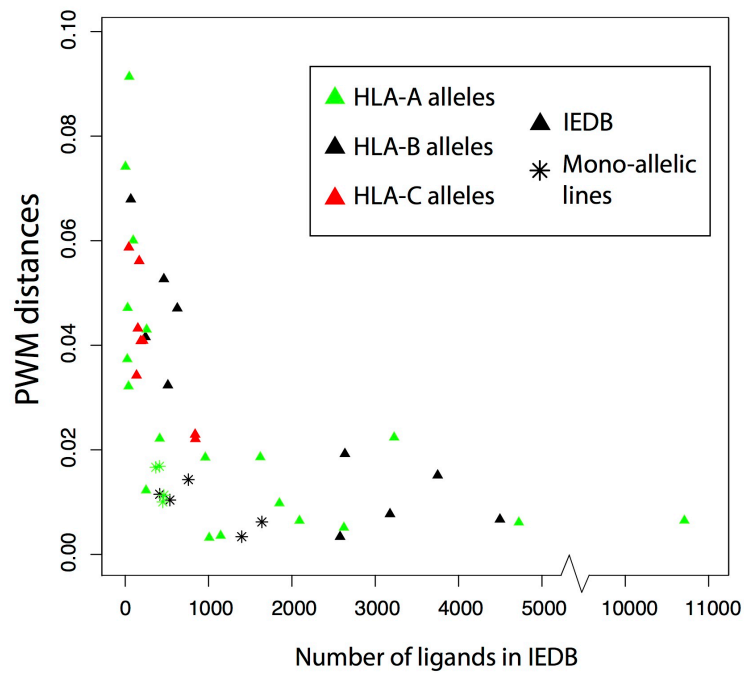

**Fig C:** PWM distances between the motif predicted in this work and motifs derived from IEDB, as a function of the number of ligands in IEDB.

| HLA alleles | predicted motifs | MS IEDB-derived motifs | non-MS IEDB-derived motifs |
|-------------|------------------|------------------------|----------------------------|
| A01:01*     | 2076 peptides    | 1591 peptides          | 845 peptides               |
| A02:01      | 6886 peptides    | 5018 peptides          | 4808 peptides              |
| A02:05      | 370 peptides     | 209 peptides           | 28 peptides                |
| A02:06      | 303 peptides     | no ligand              | 1388 peptides              |
| A02:20      | 655 peptides     | no ligand              | no ligand                  |
| A03:01*     | 6581 peptides    | 955 peptides           | 2098 peptides              |
| A11:01*     | 1072 peptides    | 335 peptides           | 2187 peptides              |
| A23:01      | 1800 peptides    | TFLPFIHTI              | 510 peptides               |

| HLA alleles | predicted motifs | MS IEDB-derived motifs | non-MS IEDB-derived motifs |
|-------------|------------------|------------------------|----------------------------|
| A24:02*     | 2344 peptides    | 1939 peptides          | 1606 peptides              |
| A25:01      | 628 peptides     | no ligand              | 65 peptides                |
| A26:01      | 693 peptides     | no ligand              | 606 peptides               |
| A29:02*     | 396 peptides     | 3888 peptides          | 572 peptides               |
| A32:01      | 441 peptides     | 2 peptides             | 462 peptides               |
| A68:01      | 4293 peptides    | 12 peptides            | 1110 peptides              |
| A68:02      | 751 peptides     | 24 peptides            | 1199 peptides              |

| HLA alleles | predicted motifs | MS IEDB-derived motifs | non-MS IEDB-derived motifs |
|-------------|------------------|------------------------|----------------------------|
| B07:02*     | 5808 peptides    | 3110 peptides          | 1403 peptides              |
| B08:01      | 3460 peptides    | 633 peptides           | 975 peptides               |
| B13:02      | 2106 peptides    | no ligand              | no ligand                  |
| B14:01      | 108 peptides     | no ligand              | no ligand                  |
| B14:02      | 350 peptides     | 17 peptides            | 70 peptides                |
| B15:01*     | 3642 peptides    | 1012 peptides          | 2105 peptides              |
| B15:11      | 345 peptides     | no ligand              | no ligand                  |
| B15:18      | 902 peptides     | no ligand              | no ligand                  |
| B18:01      | 2048 peptides    | 88 peptides            | 317 peptides               |
| B18:03      | 119 peptides     | no ligand              | no ligand                  |
| B27:04      | 1523 peptides    | 734 peptides           | 23 peptides                |
| B27:05*     | 3578 peptides    | 2083 peptides          | 520 peptides               |
| B35:01*     | 2126 peptides    | 445 peptides           | 1220 peptides              |
| B35:03      | 3106 peptides    | 102 peptides           | HPNIEEVAL                  |

| HLA alleles | predicted motifs | MS IEDB-derived motifs | non-MS IEDB-derived motifs |
|-------------|------------------|------------------------|----------------------------|
| B35:08      | 425 peptides     | 101 peptides           | IPSIDVHHY                  |
| B38:01      | 2987 peptides    | 4 peptides             | 21 peptides                |
| B39:01      | 2030 peptides    | 3 peptides             | 327 peptides               |
| B39:06      | 2080 peptides    | 21 peptides            | 3 peptides                 |
| B39:24      | 454 peptides     | no ligand              | no ligand                  |
| B40:01*     | 1441 peptides    | 277 peptides           | 638 peptides               |
| B41:01      | 101 peptides     | 40 peptides            | no ligand                  |
| B44:02*     | 3066 peptides    | 1756 peptides          | 319 peptides               |
| B44:03*     | 3367 peptides    | 885 peptides           | 253 peptides               |
| B45:01      | 1250 peptides    | 94 peptides            | 123 peptides               |
| B50:01      | 918 peptides     | 250 peptides           | no ligand                  |
| B56:01      | 187 peptides     | 3 peptides             | no ligand                  |
| B57:01*     | 2947 peptides    | 575 peptides           | 427 peptides               |
| B73:01      | 456 peptides     | no ligand              | 76 peptides                |



| HLA alleles | predicted motifs  | MS IEDB-derived motifs            | non-MS IEDB-derived motifs | HLA alleles | predicted motifs | MS IEDB-derived motifs | non-MS IEDB-derived motifs |
|-------------|-------------------|-----------------------------------|----------------------------|-------------|------------------|------------------------|----------------------------|
| C03:03      | 1333 peptides<br> | 3 peptides<br>VYSPYEF<br>ATAKALAI | 125 peptides<br>           | C07:02      | 876 peptides<br> | 46 peptides<br>        | 120 peptides<br>           |
| C04:01*     | 805 peptides<br>  | 472 peptides<br>ED                | 325 peptides<br>           | C07:04      | 187 peptides<br> | no ligand              | no ligand                  |
| C05:01      | 1722 peptides<br> | 729 peptides<br>                  | 84 peptides<br>            | C12:03      | 335 peptides<br> | 6 peptides<br>         | 143 peptides<br>           |
| C06:02      | 1768 peptides<br> | 8 peptides<br>RCEVRF              | 124 peptides<br>           | C16:01      | 392 peptides<br> | 214 peptides<br>       | no ligand                  |
| C07:01      | 420 peptides<br>  | 10 peptides<br>SXVTH              | 34 peptides<br>            |             |                  |                        |                            |

**Fig D:** Comparison between the HLA-I motifs identified by integrating data across all HLA peptidomics studies and the motifs from IEDB (either MS and non-MS data). When only one peptide was present the sequence of the peptide is indicated. Stars indicate motifs considered in the analyses of Fig J.

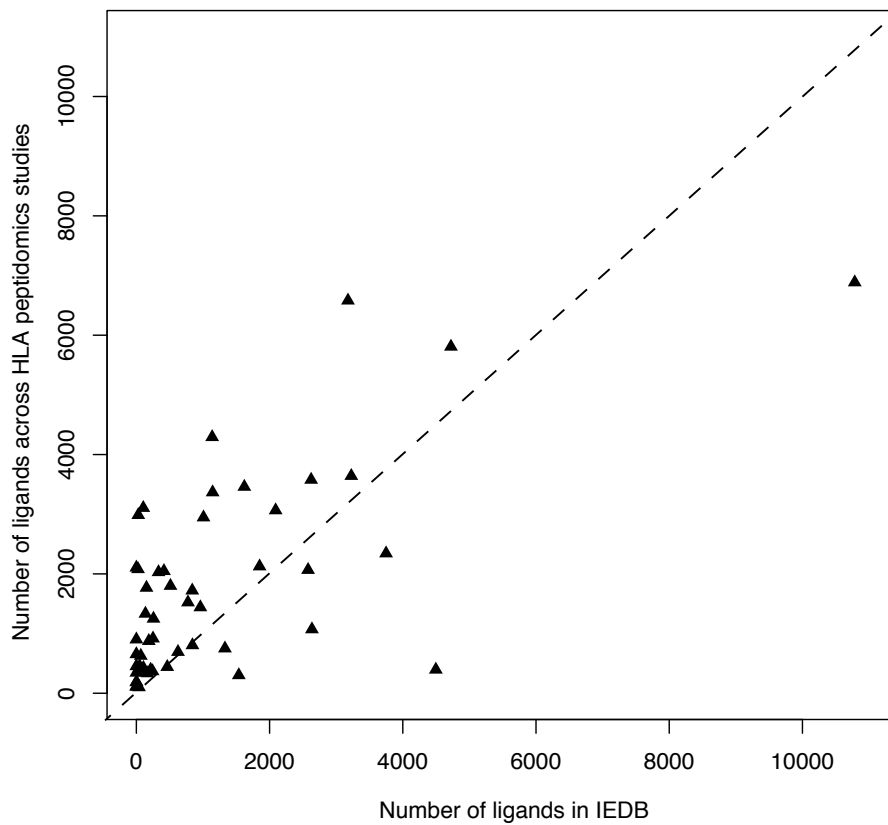

**Fig E:** Number of peptides assigned to each allele across the HLA peptidomics studies considered in this work, compared to IEDB data (see all raw numbers in Fig D).

**A**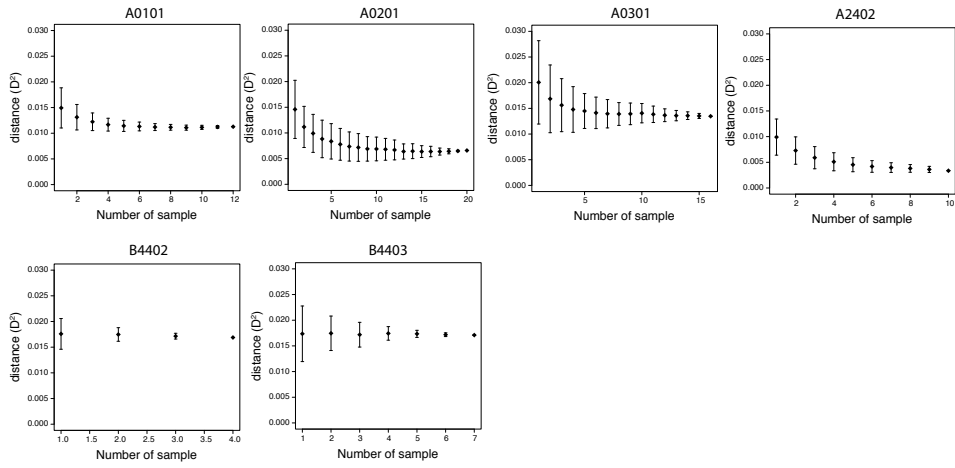**B**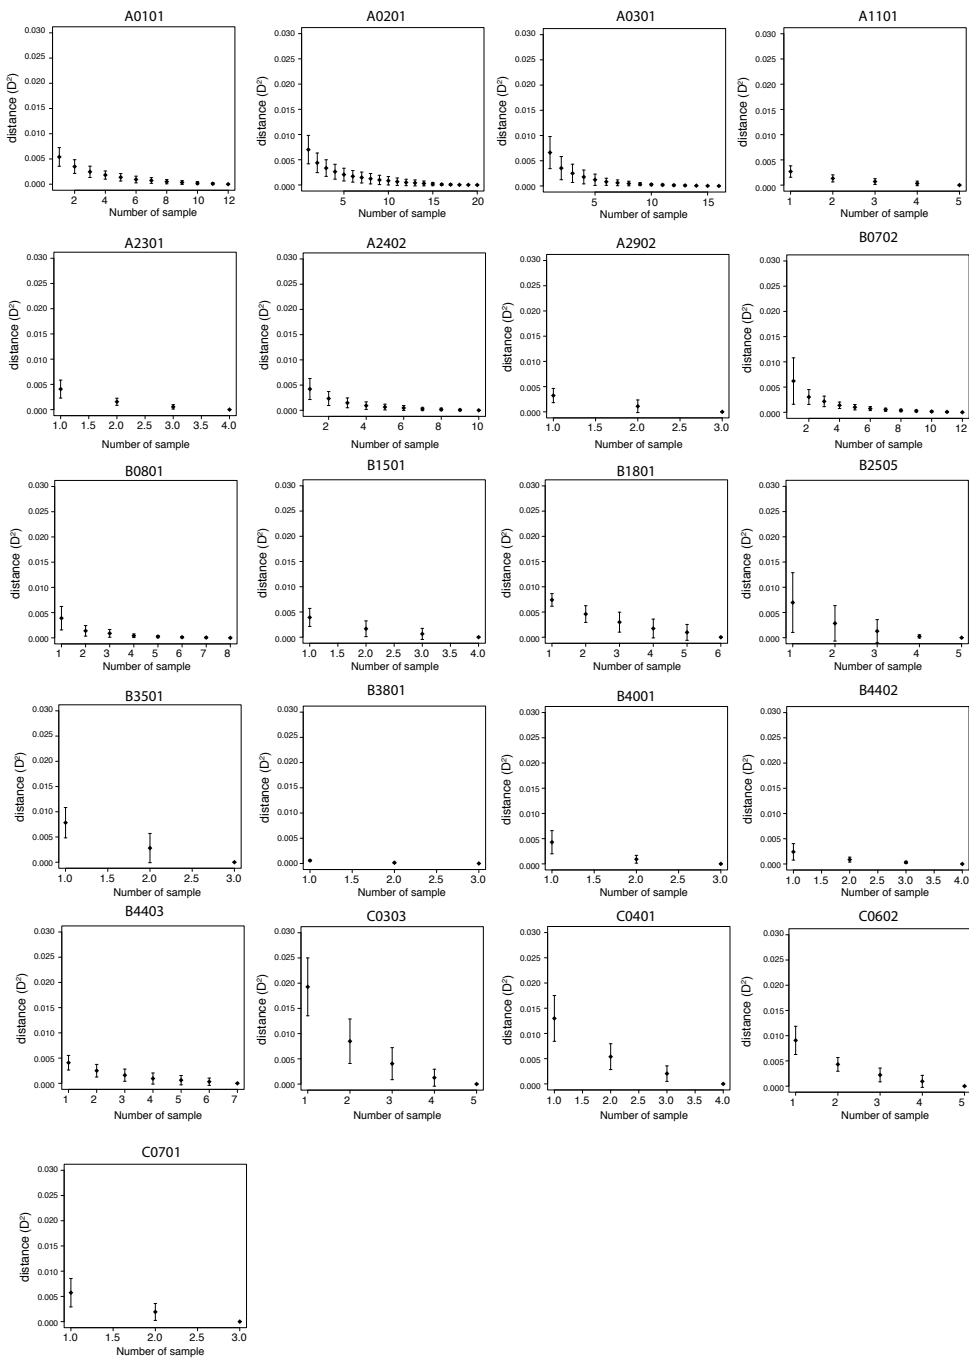

**Fig F:** (a) Distance between the motifs predicted in our work and those derived from mono-allelic cell lines [2], as a function of the number of samples that are considered (error bars correspond to 100 random choices). The six alleles were selected as those with motifs detected in more than 3 samples in our dataset of pooled HLA peptidomics data and present in the mono-allelic cell lines of [2]. Of note, some small contaminations or batch effects are expected even in mono-allelic cell lines and we did not expect distances to fall exactly to zero. (b) Same as in A, but comparing with the motifs derived from all samples, for all alleles present in at least three samples. By construction all distances fall to 0. The most important message of this figure is that all distances (even when considering only one sample) are very small, and much smaller than the 0.078 threshold used to determine two motifs as ‘similar’.

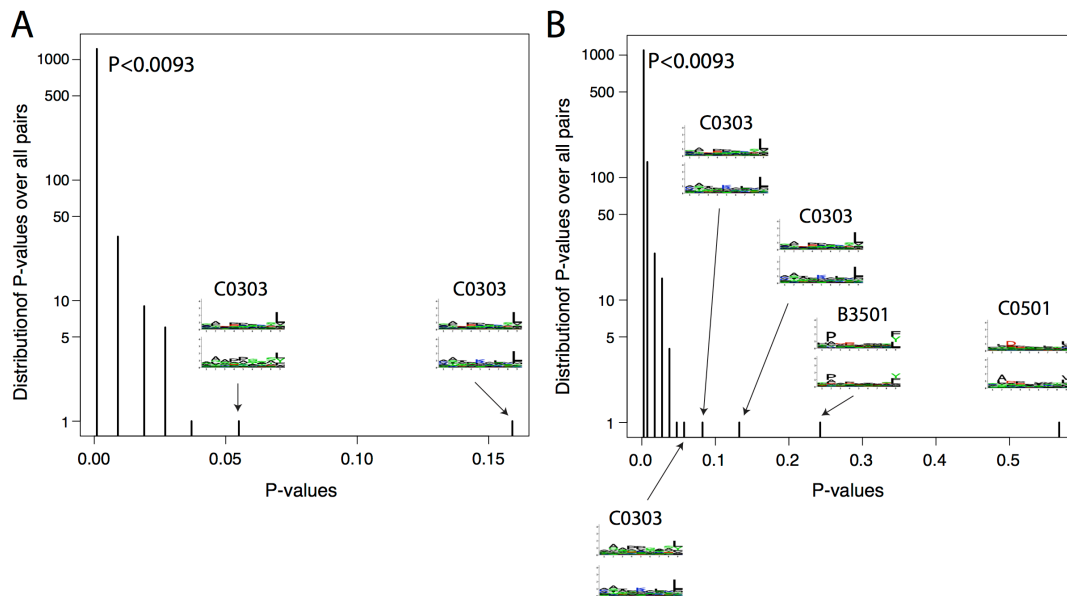

**Fig G:** Distribution of P-values of similarities over all pairs of motifs annotated to the same alleles. Empirical P-values were computed by comparing for each pair of motif ( $m_i, m_j$ ) the similarity between  $m_i$  and the set of known HLA-I motifs, excluding the one to which  $m_i$  had been annotated (107 motifs in total, see Methods). In (a), the Euclidean distance was used and in (b) the BLiC score of ref. [3]. The first bar of the graphs shows the number of cases where the similarity was higher than to any of the known HLA-I motifs used for estimating these empirical P-values ( $P < 1/107 = 0.0093$ ). The very few pairs of motifs that do not pass the statistical threshold are shown explicitly, as well as the allele to which they had been assigned.

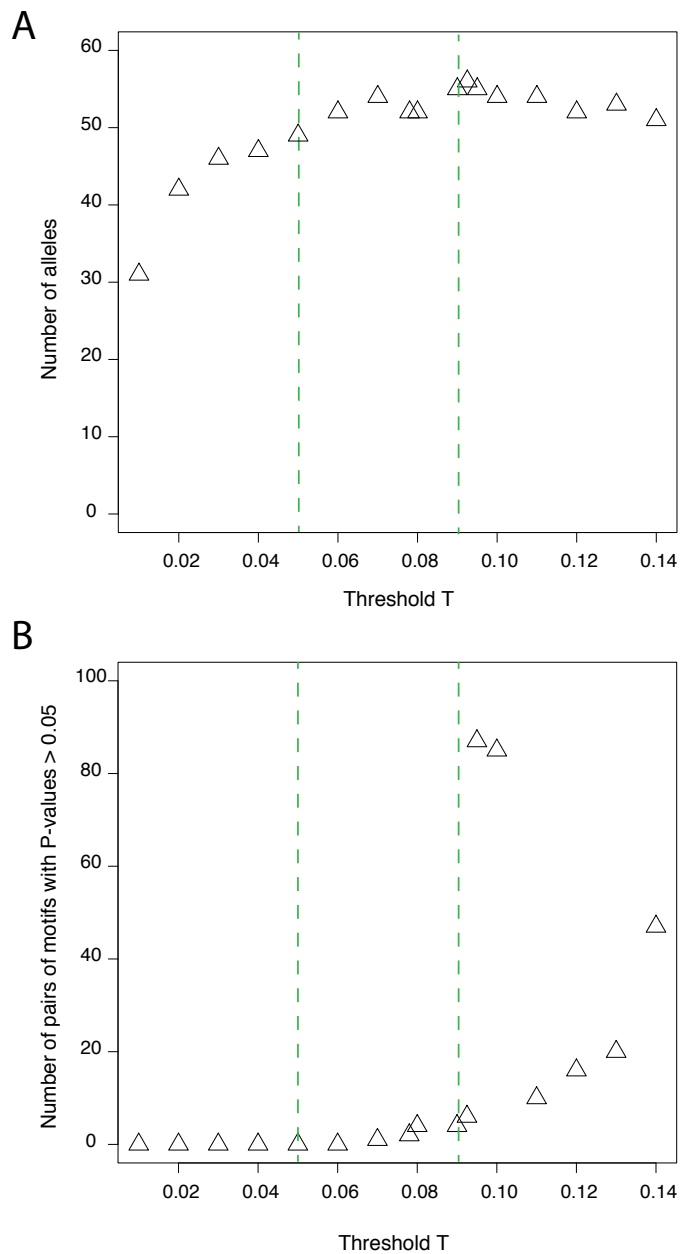

**Fig H:** Effect of different thresholds T for the Euclidean distance. (a) Number of HLA-I alleles with at least one motif annotated to them as a function of T. (b) Number of pairs of motifs annotated to the same allele with similarity P-values (based on Euclidean distance) larger than 0.05, as a function of T. The green bars indicate a possible range of values of T that leads to similar number of alleles being detected and few pairs of motifs with P-values > 0.05. The non-linearity can be expected since our algorithm is an optimization procedure.

| HLA alleles | Predicted logo                                                                    | Known ligands            |
|-------------|-----------------------------------------------------------------------------------|--------------------------|
| HLA-A25:01  | 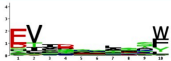 | <i>no ligands</i>        |
| HLA-B13:02  |  | GQFKDIITKV<br>YILGADPLRV |
| HLA-B38:01  |  | <i>no ligands</i>        |
| HLA-B39:06  |  | <i>no ligands</i>        |
| HLA-B56:01  |  | <i>no ligands</i>        |
| HLA-B73:01  |  | <i>no ligands</i>        |

**Fig I:** New HLA-I binding motifs identified for 10-mers across all HLA peptidomics datasets.

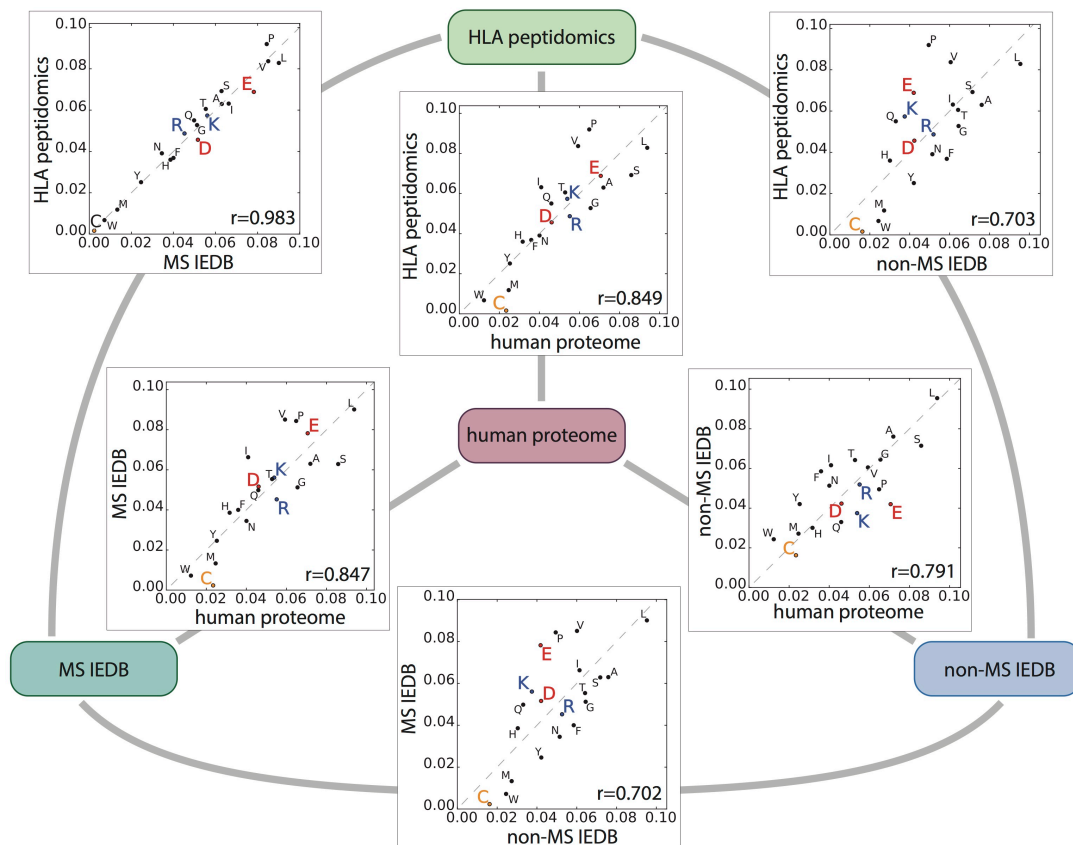

**Fig J:** Comparison between amino acid frequencies at positions P4 to P7 in HLA peptidomics data from unmodified cell lines or tissue samples, MS IEDB data, non-MS IEDB data, and the human proteome. Only alleles with at least 100 ligands in our dataset, IEDB non-MS and IEDB MS were used (marked with \* in Fig D).

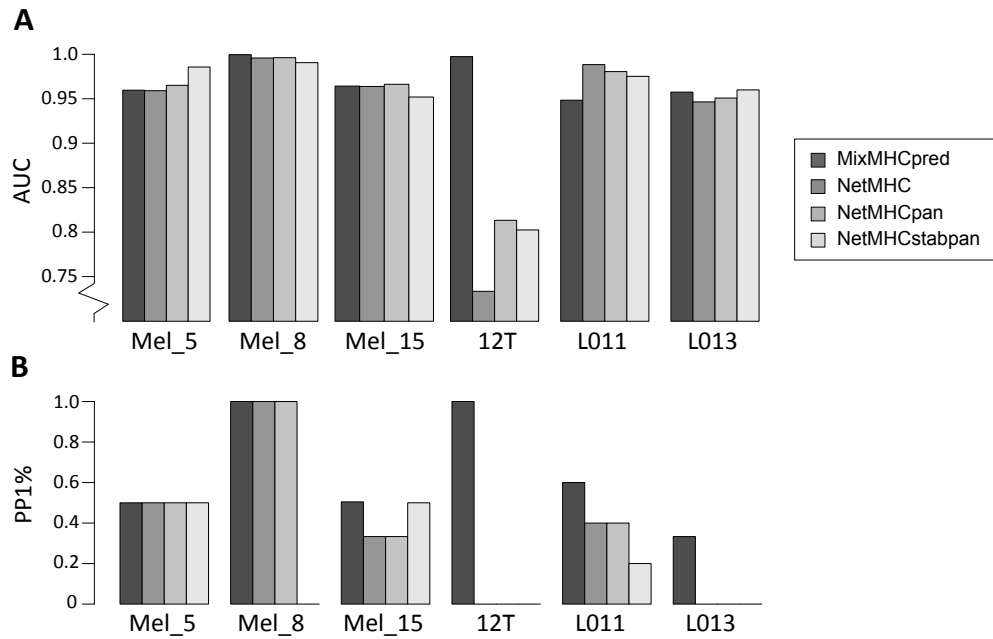

**Fig K:** Comparison between our predictor (MixMHCpred) and existing tools when excluding endogenous HLA-I ligands from the sample in which mutated neo-antigens had been identified (same comparison as in Fig 4B-C, other benchmarkings remain the same).

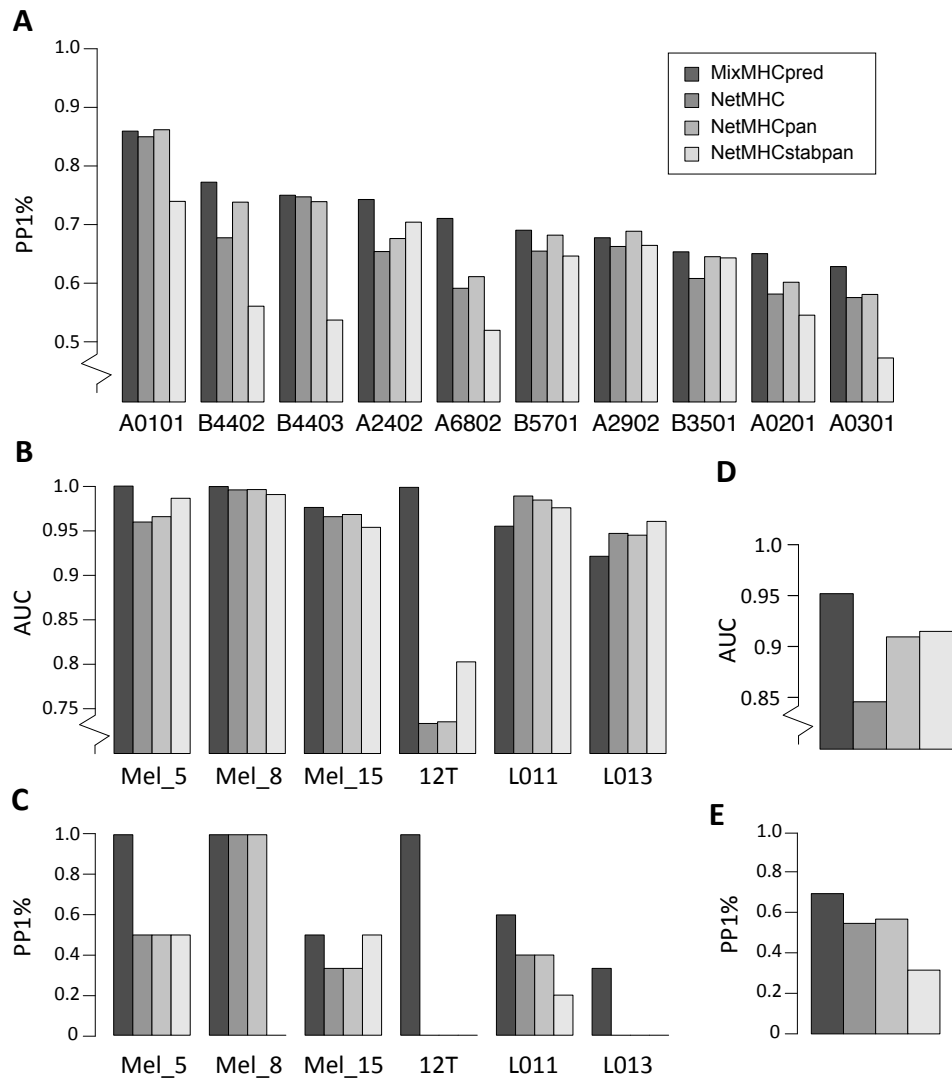

**Fig L:** Comparison between our predictor (MixMHCpred) and existing tools when adding 5% of noise in the pooled HLA peptidomics data used to train our predictor.

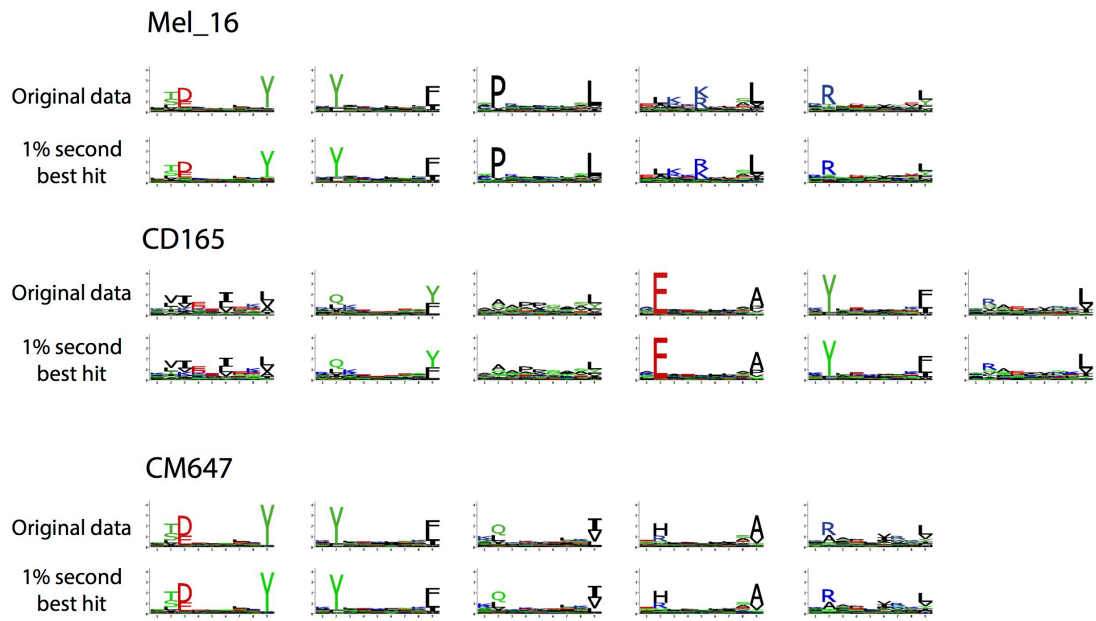

**Fig M:** Comparison of the deconvoluted motifs for the three samples shown in Fig 1, when using the second best hit in spectral searches for 1% of the peptides.



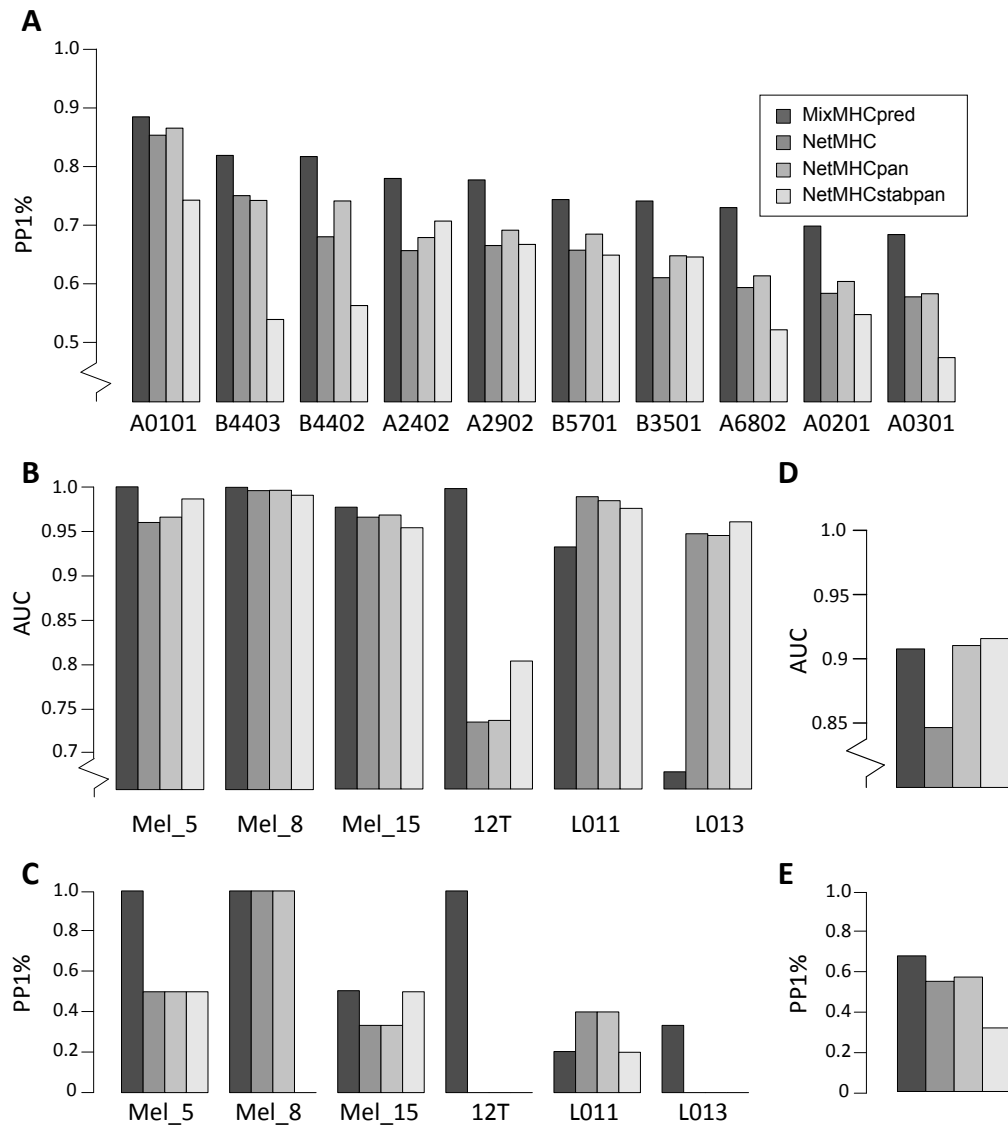

**Fig N:** Performance of predictors when using amino acid frequencies from the human proteome (instead of those found at non-anchor residues) in MixMHCpred (same data as in Fig 4). In this case, cysteine containing peptides are poorly predicted, which increases the performance of MixMHCpred on elution data (mainly panel A), but decreases the performance on other datasets (especially L011 and L013).

| HLA alleles | Binding motif | Amino acid at position 90 | HLA alleles | Binding motif                 | Amino acid at position 90 |
|-------------|---------------|---------------------------|-------------|-------------------------------|---------------------------|
| HLA-A02:20  |               | asparagine                | HLA-B27:10  |                               | isoleucine                |
| HLA-A03:01  |               | asparagine                | HLA-B27:20  |                               | isoleucine                |
| HLA-A03:19  |               | asparagine                | HLA-B40:13  |                               | isoleucine                |
| HLA-A30:01  |               | asparagine                | HLA-B41:01  |                               | isoleucine                |
| HLA-A30:04  |               | asparagine                | HLA-B41:02  |                               | isoleucine                |
| HLA-A31:01  |               | asparagine                | HLA-B42:01  |                               | isoleucine                |
| HLA-A32:01  |               | asparagine                | HLA-B47:01  |                               | isoleucine                |
| HLA-A32:07  |               | asparagine                | HLA-B48:01  |                               | isoleucine                |
| HLA-B13:01  |               | isoleucine                | HLA-B57:01  |                               | asparagine                |
| HLA-B13:02  |               | isoleucine                | HLA-B57:02  |                               | asparagine                |
| HLA-B15:01  |               | isoleucine                | HLA-B57:03  | X-ray structure with KAFSPEVI | asparagine                |
| HLA-B15:42  |               | isoleucine                | HLA-C15:02  |                               | asparagine                |

**Fig O:** Binding motifs and amino acid at position 66 for HLA-I alleles showing some preference for charged amino acids (R or K) at P1.

**A**

| HLA alleles | Binding motif                                                                       |
|-------------|-------------------------------------------------------------------------------------|
| HLA-B15:09  | 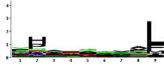   |
| HLA-B15:10  |    |
| HLA-B15:18  |    |
| HLA-B38:01  |    |
| HLA-B39:01  |    |
| HLA-B39:05  |    |
| HLA-B39:06  |    |
| HLA-B39:09  |  |

**B**

| HLA alleles | Binding motif                                                                      |
|-------------|------------------------------------------------------------------------------------|
| HLA-B14:01  | 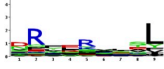 |
| HLA-B14:02  |  |
| HLA-B14:03  |  |

**Fig P:** (a) Binding motifs for HLA-I alleles showing preference for histidine at P2. (b) Binding motifs for HLA-B14 alleles displaying the same P2 binding site as HLA-B15:18.

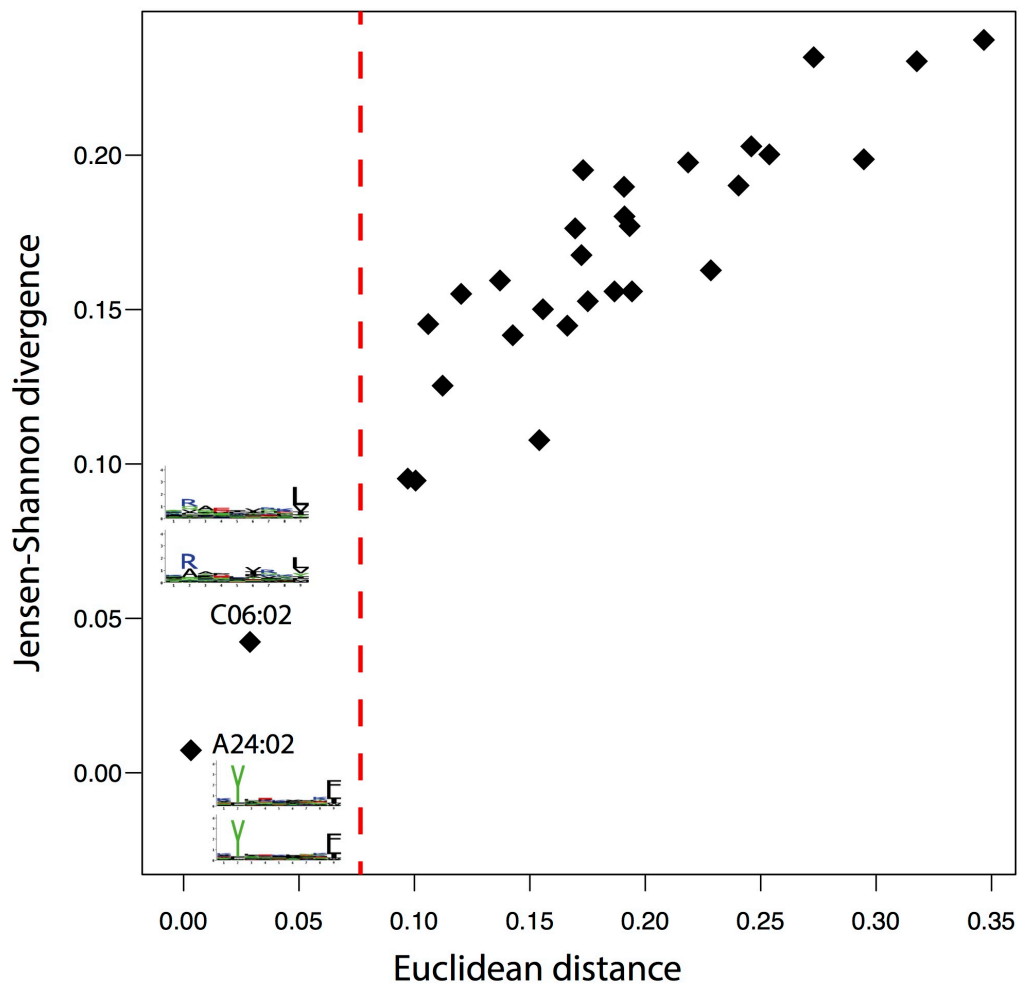

**Fig Q:** Comparison of the motif similarity values using Euclidean distance and Jensen-Shannon divergence (average of Jensen-Shannon divergence over all 9 positions) for all 5x6 pairs of motifs between two last samples (CD165 and CM467) shown in Fig 1. The red line shows the cut-off on Euclidean distance used in this work.

**Table A:** HLA peptidomics datasets analyzed in this work. Columns 2 and 3 show the number of unique peptides in each dataset. The first ten samples have been generated for this work.

| Samples        | 9-mers | 10-mers | HLA-A  | HLA-A  | HLA-B  | HLA-B  | HLA-C  | HLA-C  |
|----------------|--------|---------|--------|--------|--------|--------|--------|--------|
| CD165          | 3799   | 847     | A02:05 | A24:02 | B15:01 | B50:01 | C03:03 | C06:02 |
| CM467          | 5279   | 921     | A01:01 | A24:02 | B13:02 | B39:06 | C06:02 | C12:03 |
| GD149          | 5960   | 2063    | A01:01 | A24:02 | B38:01 | B44:03 | C06:02 | C12:03 |
| MD155          | 3089   | 493     | A02:01 | A24:02 | B15:01 | B18:01 | C03:03 | C07:01 |
| PD42           | 1392   | 450     | A02:06 | A24:02 | B07:02 | B55:01 | C01:02 | C07:02 |
| RA957          | 6652   | 1944    | A02:20 | A68:01 | B35:03 | B39:01 | C04:01 | C07:02 |
| TIL1           | 4012   | 711     | A02:01 | B18:01 | B38:01 |        | C05:01 |        |
| TIL3           | 5896   | 1290    | A01:01 | A23:01 | B07:02 | B15:01 | C12:03 | C14:02 |
| Apher1         | 3527   | 1273    | A03:01 | A29:02 | B44:02 | B44:03 | C12:03 | C16:01 |
| Apher6         | 1138   | 376     | A02:01 | A03:01 | B07:02 |        | C07:02 |        |
| Mel15 [1]      | 11094  | 4865    | A03:01 | A68:01 | B27:05 | B35:03 | C02:02 | C04:01 |
| Mel16 [1]      | 7460   | 1769    | A01:01 | A24:02 | B07:02 | B08:01 | C07:01 | C07:02 |
| Mel12 [1]      | 2467   | 417     | A01:01 |        | B08:01 |        | C07:01 |        |
| Mel8 [1]       | 3408   | 1283    | A01:01 | A03:01 | B07:02 | B08:01 | C07:01 | C07:02 |
| Mel5 [1]       | 3108   | 750     | A01:01 | A25:01 | B08:01 | B18:01 |        |        |
| Fibroblast [4] | 3492   | 859     | A03:01 | A23:01 | B08:01 | B15:18 | C07:02 | C07:04 |
| HCC1143 [4]    | 1989   | 284     | A31:01 | B35:08 | B37:01 | C04:01 | C06:02 |        |
| HCC1937 [4]    | 2926   | 1065    | A23:01 | A24:02 | B07:02 | B40:01 | C03:04 | C07:02 |
| HCT116 [4]     | 2665   | 737     | A01:01 | A02:01 | B45:01 | B18:01 | C05:01 | C07:01 |
| JY [4]         | 1740   | 483     | A02:01 |        | B07:02 |        | C07:02 |        |
| Bcell [5]      | 5974   | 2521    | A01:01 | A03:01 | B07:02 | B27:05 | C02:02 | C07:01 |
| Mel-624 [6]    | 1403   | 425     | A02:01 | A03:01 | B07:02 | B14:01 | C07:02 | C08:01 |
| SK-Mel-5 [6]   | 1845   | 618     | A02:01 | A11:01 | B40:01 |        | C03:03 |        |
| HEK293 [7]     | 2477   | 1221    | A03:01 |        | B07:02 |        | C07:02 |        |
| MAVER_1 [7]    | 4912   | 1423    | A24:02 | A26:01 | B38:01 | B44:02 | C05:01 | C12:03 |
| HL_60 [7]      | 3308   | 1437    | A01:01 |        | B57:01 |        | C06:02 |        |
| RPMI8226 [7]   | 3237   | 647     | A30:01 | A68:02 | B15:03 | B15:10 | C02:10 | C03:04 |
| THP_1 [7]      | 4085   | 656     | A02:01 | A24:02 | B15:11 | B35:01 | C03:03 |        |
| CA46 [7]       | 2063   | 414     | A26:03 |        | B27:04 |        | C12:02 |        |
| LNT-229 [8]    | 5202   | 2191    | A03:01 |        | B35:01 |        | C04:01 |        |
| T98G [8]       | 6294   | 1413    | A02:01 |        | B39:06 |        | C07:02 |        |
| U-87 [8]       | 6992   | 2126    | A02:01 |        | B44:02 |        | C05:01 |        |
| pat_AC2 [9]    | 920    | 267     | A03:01 | A32:01 | B27:05 | B45:01 |        |        |
| pat_C [9]      | 1423   | 641     | A02:01 | A03:01 | B07:02 |        | C07:02 |        |

|              |      |      |        |        |        |        |        |        |
|--------------|------|------|--------|--------|--------|--------|--------|--------|
| pat_CELG [9] | 2068 | 664  | A02:01 | A24:02 | B15:01 | B73:01 | C03:03 | C15:05 |
| pat_CP2 [9]  | 1055 | 376  | A11:01 |        | B14:02 | B44:02 |        |        |
| pat_FL [9]   | 2127 | 873  | A03:01 | A11:01 | B44:03 | B50:01 |        |        |
| pat_J [9]    | 1215 | 551  | A02:01 | A03:01 | B07:02 |        | C07:02 |        |
| pat_JPB3 [9] | 1009 | 487  | A02:01 | A11:01 | B27:05 | B56:01 |        |        |
| pat_JT2 [9]  | 846  | 287  | A11:01 |        | B18:03 | B35:01 |        |        |
| pat_M [9]    | 1523 | 574  | A03:01 | A29:02 | B08:01 | B44:03 | C07:01 | C16:01 |
| pat_MA [9]   | 1998 | 808  | A02:01 | A29:02 | B44:03 | B57:01 | C07:01 | C16:01 |
| pat_ML [9]   | 1580 | 811  | A02:01 | A11:01 | B40:01 | B44:03 |        |        |
| pat_NS2 [9]  | 435  | 91   | A02:01 |        | B13:02 | B41:01 |        |        |
| pat_NT [9]   | 1522 | 252  | A01:01 | A32:01 |        |        |        |        |
| pat_PF1 [9]  | 2484 | 1049 | A01:01 | A02:01 | B07:02 | B44:03 | C07:02 | C16:01 |
| pat_R [9]    | 1406 | 549  | A03:01 | A29:02 | B08:01 | B44:03 | C07:01 | C16:01 |
| pat_RT [9]   | 1425 | 333  | A01:01 | A02:01 | B18:01 | B39:24 | C05:01 | C07:01 |
| pat_SR [9]   | 1642 | 505  | A02:01 | A23:01 | B18:01 | B44:03 |        |        |
| pat_ST [9]   | 771  | 283  | A03:01 | A24:02 | B07:02 | B27:05 |        |        |

**Table B:** Amino acid frequencies at non-anchor positions (P4 to P7) in HLA-I ligands from pooled HLA peptidomics data.

|   |          |
|---|----------|
| A | 0.060782 |
| C | 0.001453 |
| D | 0.045653 |
| E | 0.073598 |
| F | 0.035112 |
| G | 0.049635 |
| H | 0.037461 |
| I | 0.06487  |
| K | 0.059036 |
| L | 0.083318 |
| M | 0.011609 |
| N | 0.039796 |
| P | 0.090261 |
| Q | 0.056825 |
| R | 0.050559 |
| S | 0.066348 |
| T | 0.059356 |
| V | 0.083667 |
| W | 0.006434 |
| Y | 0.024228 |

**Table C:** Ranking of the neo-antigens identified in two lung cancer samples [10]. Column 4 shows the ranking based on our predictor. Column 6-8 show the ranking based on NetMHC[11], NetMHCpan[12] and NetMHCstabpan[13].

| Sample | Sequence            | Protein   | Mutation | Rank      | Net-MHC    | Net-MHC-pan | Net-MHC-stabpan | # Candidates |
|--------|---------------------|-----------|----------|-----------|------------|-------------|-----------------|--------------|
| L011   | SVTNEFC <u>L</u> K  | DOCK10    | R1149L   | <b>13</b> | 26         | 21          | 9               | 7414         |
| L011   | GTSAPRKKK           | XIRP2     | Q2514K   | <b>58</b> | 213        | 281         | 110             | 7414         |
| L011   | FAFQ <u>E</u> YDSF  | MTFR2     | D326Y    | 65        | <b>6</b>   | 10          | 296             | 7414         |
| L011   | RSMRTVYGL <u>F</u>  | OR2A2     | C317F    | 712       | <b>83</b>  | 136         | 221             | 7414         |
| L011   | GPEELGL <u>P</u> M  | SOHLH2    | L159M    | 1070      | <b>109</b> | 158         | 292             | 7414         |
| L013   | ALQSR <u>L</u> QAL  | CACNA1I   | R464L    | <b>3</b>  | 151        | 178         | 118             | 2700         |
| L013   | KVCCCQILL           | OR4P4     | W300C    | 168       | 224        | <b>153</b>  | <b>153</b>      | 2700         |
| L013   | YSNYY <u>C</u> GLRY | KRTAP20-2 | G9C      | 177       | 63         | 124         | <b>58</b>       | 2700         |



**Table D:** List of cancer testis antigens with epitopes and HLA restriction information from the CTDatabase [14].

| Protein | Epitope    | Allele | Protein | Epitope    | Allele |
|---------|------------|--------|---------|------------|--------|
| BAGE    | AARAVFLAL  | C16:01 | MAGEA12 | EGDCAPEEK  | C07:01 |
| CCDC110 | NYNNFYRFL  | A24:02 | MAGEA2  | YLQLVFGIEV | A02:01 |
| CCDC110 | EYSKECLKEF | A24:02 | MAGEA2  | EYLQLVFGI  | A24:02 |
| CCDC110 | EYLSLSDKI  | A24:02 | MAGEA2  | EGDCAPEEK  | C07:01 |
| CTAG1A  | SLLMWITQC  | A02:01 | MAGEA3  | EVDPIGHLY  | A01:01 |
| CTAG1A  | ASGPGGGAPR | A02:01 | MAGEA3  | FLWGPRALV  | A02:01 |
| CTAG1A  | MPFATPMEA  | B35:01 | MAGEA3  | KVAELVHFL  | A02:01 |
| CTAG1A  | MPFATPMEA  | B51:01 | MAGEA3  | TFPDLESEF  | A24:02 |
| CTAG1A  | ARGPESRLL  | C06:02 | MAGEA3  | VAELVHFL   | A24:02 |
| CTAG1A  | LAMPFATPM  | C03:03 | MAGEA3  | MEVDPIGHLY | B18:01 |
| CTAG2   | ELVRRILSR  | A68:01 | MAGEA3  | EVDPIGHLY  | B35:01 |
| CT83    | RQKRILVNL  | B15:01 | MAGEA3  | AELVHFL    | B40:01 |
| MAGEA1  | EADPTGHSY  | A01:01 | MAGEA3  | MEVDPIGHLY | B44:02 |
| MAGEA1  | KVLEYVIKV  | A02:01 | MAGEA3  | EGDCAPEEK  | C07:01 |
| MAGEA1  | SLFRAVITK  | A03:01 | MAGEA4  | EVDPASNTY  | A01:01 |
| MAGEA1  | EVYDGREHSA | A68:02 | MAGEA4  | GVYDGREHTV | A02:01 |
| MAGEA1  | RVRFFPSL   | B07:02 | MAGEA4  | NYKRCPVI   | A24:02 |
| MAGEA1  | EADPTGHSY  | B35:01 | MAGEA6  | EVDPIGHVY  | B35:01 |
| MAGEA1  | SAYGEPRKL  | C03:03 | MAGEA6  | EGDCAPEEK  | C07:01 |
| MAGEA1  | SAYGEPRKL  | C16:01 | MAGEA6  | ISGGPRISY  | C16:01 |
| MAGEA10 | GLYDGMEHL  | A02:01 | MAGEA9  | ALSVMGVYV  | A02:01 |
| MAGEA12 | FLWGPRALV  | A02:01 | SAGE1   | LYATVIHDI  | A24:02 |
| MAGEA12 | FLWGPRALV  | C07:01 | SSX2    | KASEKIFYV  | A02:01 |

## References

1. Bassani-Sternberg M, Bräunlein E, Klar R, Engleitner T, Sinitcyn P, Audehm S, et al. Direct identification of clinically relevant neoepitopes presented on native human melanoma tissue by mass spectrometry. *Nat Commun. Nature Publishing Group*; 2016;7: 13404. doi:10.1038/ncomms13404
2. Abelin JG, Keskin DB, Sarkizova S, Hartigan CR, Zhang W, Sidney J, et al. Mass Spectrometry Profiling of HLA-Associated Peptidomes in Mono-allelic Cells Enables More Accurate Epitope Prediction. *Immunity*. 2017;46: 315–326. doi:10.1016/j.immuni.2017.02.007
3. Habib N, Kaplan T, Margalit H, Friedman N. A novel Bayesian DNA motif comparison method for clustering and retrieval. Fraenkel E, editor. *PLoS Comput Biol*. 2008;4: e1000010. doi:10.1371/journal.pcbi.1000010
4. Bassani-Sternberg M, Pletscher-Frankild S, Jensen LJ, Mann M. Mass spectrometry of human leukocyte antigen class I peptidomes reveals strong effects of protein abundance and turnover on antigen presentation. *Mol Cell Proteomics*. 2015;14: 658–673. doi:10.1074/mcp.M114.042812
5. Mommen GPM, Frese CK, Meiring HD, van Gaans-van den Brink J, de Jong APJM, van Els CACM, et al. Expanding the detectable HLA peptide repertoire using electron-transfer/higher-energy collision dissociation (ETHcD). *Proc Natl Acad Sci USA. National Acad Sciences*; 2014;111: 4507–4512. doi:10.1073/pnas.1321458111
6. Gloger A, Ritz D, Fugmann T, Neri D. Mass spectrometric analysis of the HLA class I peptidome of melanoma cell lines as a promising tool for the identification of putative tumor-associated HLA epitopes. *Cancer Immunol Immunother*. 2016;65: 1377–1393. doi:10.1007/s00262-016-1897-3
7. Ritz D, Gloger A, Weide B, Garbe C, Neri D, Fugmann T. High-sensitivity HLA class I peptidome analysis enables a precise definition of peptide motifs and the identification of peptides from cell lines and patients' sera. *Proteomics*. 2016;; n/a–n/a. doi:10.1002/pmic.201500445
8. Shraibman B, Kadosh DM, Barnea E, Admon A. Human Leukocyte Antigen (HLA) Peptides Derived from Tumor Antigens Induced by Inhibition of DNA Methylation for Development of Drug-facilitated Immunotherapy. *Mol Cell Proteomics. American Society for Biochemistry and Molecular Biology*; 2016;15: 3058–3070. doi:10.1074/mcp.M116.060350
9. Pearson H, Daouda T, Granados DP, Durette C, Bonneil E, Courcelles M, et al. MHC class I-associated peptides derive from selective regions of the human genome. *J Clin Invest. American Society for Clinical Investigation*; 2016;126. doi:10.1172/JCI88590
10. Bentzen AK, Marquard AM, Lyngaa R, Saini SK, Ramskov S, Donia M, et al. Large-scale detection of antigen-specific T cells using peptide-MHC-I multimers labeled with DNA barcodes. *Nat Biotechnol. Nature Research*;

2016;34: 1037–1045. doi:10.1038/nbt.3662

11. Andreatta M, Nielsen M. Gapped sequence alignment using artificial neural networks: application to the MHC class I system. *Bioinformatics*. 2015. doi:10.1093/bioinformatics/btv639
12. Nielsen M, Andreatta M. NetMHCpan-3.0; improved prediction of binding to MHC class I molecules integrating information from multiple receptor and peptide length datasets. *Genome Med. BioMed Central*; 2016;8: 33. doi:10.1186/s13073-016-0288-x
13. Rasmussen M, Fenoy E, Harndahl M, Kristensen AB, Nielsen IK, Nielsen M, et al. Pan-Specific Prediction of Peptide-MHC Class I Complex Stability, a Correlate of T Cell Immunogenicity. *J Immunol. American Association of Immunologists*; 2016;197: 1517–1524. doi:10.4049/jimmunol.1600582
14. Almeida LG, Sakabe NJ, deOliveira AR, Silva MCC, Mundstein AS, Cohen T, et al. CTdatabase: a knowledge-base of high-throughput and curated data on cancer-testis antigens. *Nucleic Acids Res*. 2009;37: D816–9. doi:10.1093/nar/gkn673
